# Supplementary material for: The impact of hypoxia preconditioning on mesenchymal stem cells performance in hypertensive kidney disease
Source: PubMed Central journal article supplement (PMC11163800; doi:10.1186/s13287-024-03778-1), 2024-06-09
Supplement: 13287_2024_3778_MOESM1_ESM.pdf [file 13287_2024_3778_MOESM1_ESM.pdf]

## **SUPPLEMENTAL TABLE OF CONTENTS**

### **Supplemental Method:**

#### **Gating strategy for flow Cytometry to confirm the expression of MSC-specific surface markers.**

Using the aspect ratio intensity and area of the brightfield channel on the Amnis Flow sight we were able to visualize and gate the single cells. Thresholds on the Amnis flow sight were determined by histograms generated by single color stained positive and negative beads. Using this data, baseline thresholds were determined to run our samples. The threshold generated by the control beads was used to visualize the images of cells in a scatterplot and determine the single cells that were positively stained<sup>1</sup>.

### **Supplemental Figures**

**Supplemental Figure 1:** Mesenchymal stem cell (MSC) showing typical morphological appearance in normoxic and hypoxic conditions under the microscope as spindle-shaped, fibroblast-like cells in culture. **(A, B respectively)**

**Supplemental Figure 2:** Mesenchymal stem cell (MSC) characterization in normoxia conditions. **(A)** Positive MSC markers (CD73, CD90 and CD105) and **(B)** negative MSC markers (CD14, CD34, CD45).

**Supplemental Figure 3:** Mesenchymal stem cell (MSC) characterization in hypoxia conditions. **(A)** Positive MSC markers (CD73, CD90 and CD105) and **(B)** negative MSC markers (CD14, CD34, CD45).

**Supplemental Figure 4:** MSC characterization by with fluorescently conjugated antibodies against CD73, CD90, CD105. **(A)** . Cells strongly positive for markers CD73, CD90 and CD105.

**Supplemental Figure 5:** MSC Morphology and differentiation. Tri-lineage differentiation into adipocyte (FABP4), chondrocyte (Aggrecan) and osteocytes (osteocalcin) and their quantification.

**Supplemental Figure 6:** Normoxia HTN vs Normoxia Healthy Control MSCs. Normoxic-MSC of hypertension vs. healthy control mapped a total of 13,469 genes, with 463 significant dysregulated genes (n=306 upregulated & n=157 downregulated).

Gene ontology analysis showed that upregulated genes were implicated in modulation of vasculature development, migration, response to growth factor and negative regulation of proliferation, whereas downregulated genes participated in insulin like growth factor binding proteins **(A, B, respectively)**. Volcano plot demonstrated the distribution of differentially expressed genes, with downregulated and upregulated genes based on p-value and  $\log_2fc$  **(C)**. Heatmap showed angiogenic and inflammatory genes upregulated in HTN MSCs compared to HC MSCs and an equal dysregulation of senescence genes in MSCs of both the groups **(D)**.

**Supplemental Figure 7:** Normoxia Healthy Control vs Hypoxia Healthy Control MSCs. In healthy control-MSCs, a total of 13138 genes were mapped, with 261 significant dysregulated genes (n=60 upregulated & n=201 downregulated). Gene ontology analysis showed that gene upregulated participated in modulation of angiogenesis and methylation, whereas downregulated genes were involved in cellular response to tumor necrosis factor **(A, B, respectively)**. Volcano plot demonstrated the distribution of differentially expressed genes, with downregulated and upregulated genes based on p-value and  $\log_2fc$  **(C)**. Heatmap showed dysregulated genes significant for angiogenesis, and inflammation upregulated more in hypoxic HC MSCs compared to normoxic HC MSCs **(D)**.

**Supplemental Figure 8:** Gene ontology (GO) analysis pathways (A) Biological Process (B) Molecular Functions (C) Cellular Components of Upregulated gene sets with significant changes between Hypoxia HKD and Normoxia HKD MSCs.

**Supplemental Figure 9:** Genes and Transcription Factor (TF) network Interactions between Normoxia HKD and Normoxia HC mRNA targets derived from STRING. Color lines represent interactions between Normoxia HKD and Normoxia HC mRNA targets according to the functional association networks. Red circles indicate common (TF) mRNA targets between Normoxia HKD MSCs and Normoxia HC MSCs.

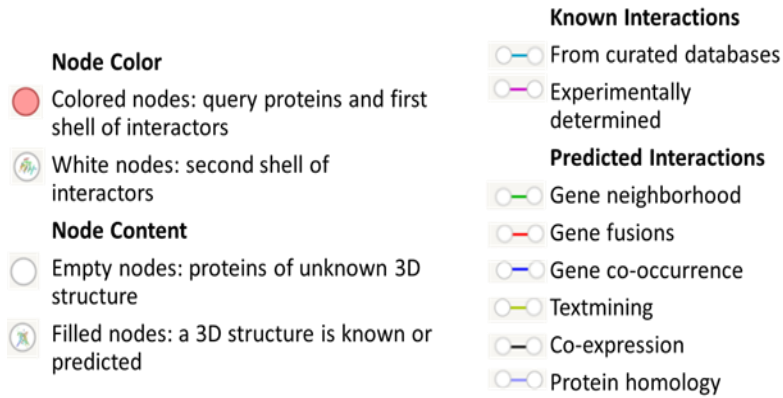

**Supplemental Figure 10:** Genes and Transcription Factor (TF) network Interactions between Normoxia HKD and Normoxia HTN mRNA targets derived from STRING. Color lines represent interactions between Normoxia HKD and Normoxia HTN mRNA targets according to the functional association networks. Red circles indicate common (TF) mRNA targets between Normoxia HKD MSCs and Normoxia HTN MSCs.

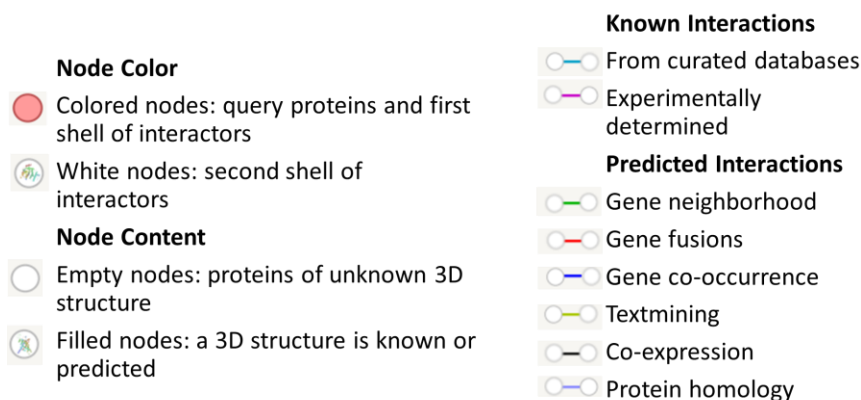

**Supplemental Figure 11:** Genes and Transcription Factor (TF) network Interactions between HKD normoxia and hypoxia mRNA targets derived from STRING. Color lines represent interactions between HKD normoxia and hypoxia mRNA targets according to the functional association networks. Red circles indicate common (TF) mRNA targets between HKD normoxia and hypoxia.

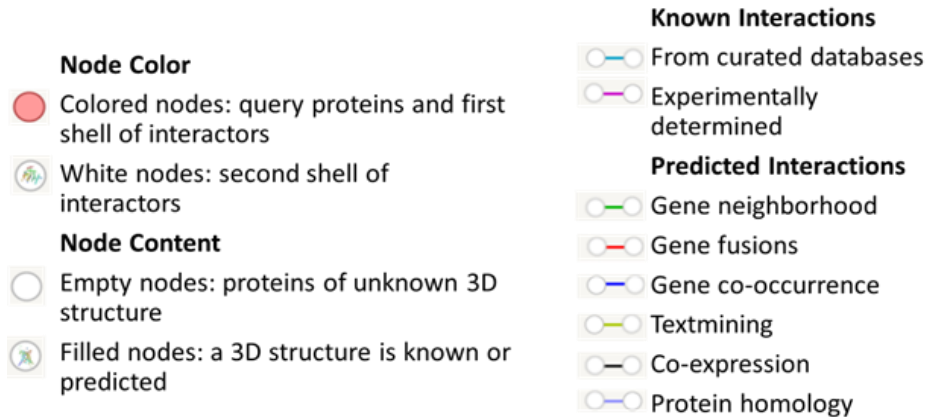

### Supplemental Figure S12: Inflammatory markers

Inflammatory factors under normoxic and hypoxic state in IFN- $\gamma$ , IL-1 $\alpha$ , IL-6, IL-8, and TNF- $\alpha$  in HC(n=12)-, HTN(n=9)- MSCs, and HKD(n=12)- MSCs. At baseline normoxic conditions, there was no difference in inflammatory cytokines released among the groups (**Fig S12A-E**). However, under HPC, there was an increase of IFN- $\gamma$  levels only in HC-MSCs (p-value=0.04) (**Fig S12-A**). Among the baseline of the HC, HTN and HKD, there was no difference (**Fig S13**).

### Supplemental Table S1: Angiogenesis secretome markers

Under normoxic conditions the expression of the pro-angiogenic factors VEGF and EGF were similar among the groups and HPC did not exert any significant effect in these specific angiogenic markers. There was a significant increase in HC MSCs EGF and HGF (Elisa) after hypoxia. We also saw a significant decrease in HKD MSCs HGF after hypoxia.

### Supplemental Table S2: Senescence markers

Under normoxic conditions the expression of P16, P21 and SA  $\beta$  GAL was non-significant but there was a trend decrease in HC MSCs SA  $\beta$  GAL activity after treatment with hypoxia.

**Supplemental Table S3:** PCR markers

At baseline normoxic conditions, there was no difference in TGF- $\beta$ , PGE, iNOS, GAPDH, IDO, IL10, IL4 among the groups.

**Supplemental Table S4A:**

Correlation between MSC Function (normoxia) and Age, MSC Function (hypoxia) and Age

At the baseline and in hypoxic conditions, there was no correlation found between the function of MSCs and the age of the patients.

**NORMOXIA**

**A.**

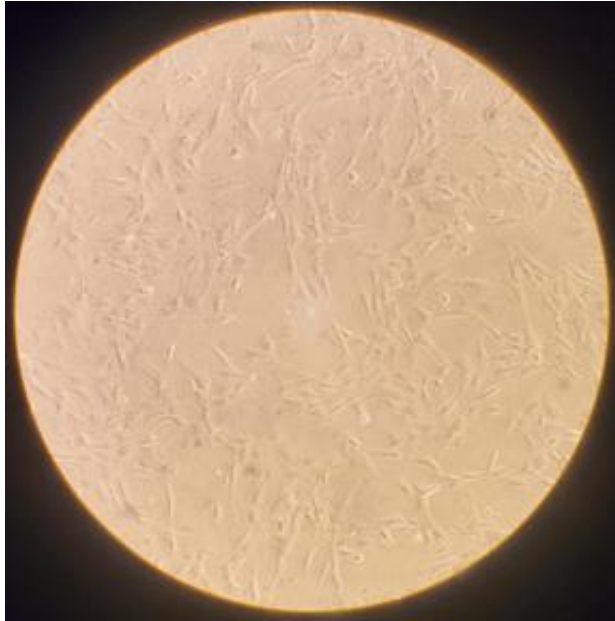

**Low Resolution  
4x objective**

**HYPOXIA**

**B.**

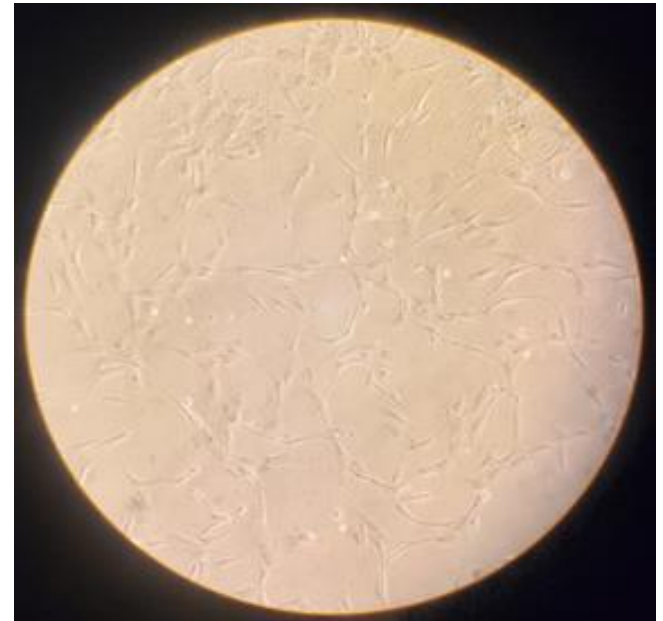

**Low Resolution  
4x objective**

**Fig. S1. Spindle-shaped morphology of cells isolated from adipose tissue of humans, characteristic of mesenchymal stem cells.**

- A. AMSC grown to confluence in Normoxia (20% O<sub>2</sub>)**
- B. Cells grown to confluence and subjected to 48 hours of HPC (1% O<sub>2</sub>)**

**AMSC, Adipose tissue derived mesenchymal stem cells; HPC, Hypoxia preconditioning, O<sub>2</sub>, Oxygen**

A.

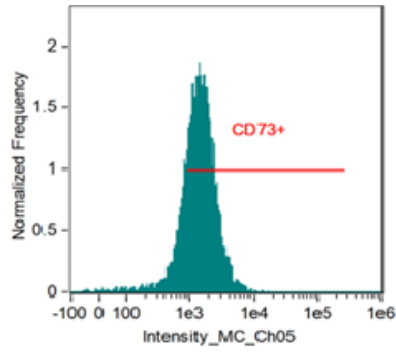

Intensity\_MC\_Ch05

| Population     | Count | %Gated |
|----------------|-------|--------|
| Single         | 10200 | 100    |
| CD73+ & Single | 8282  | 81.2   |

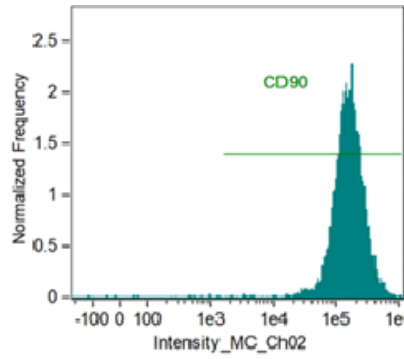

Intensity\_MC\_Ch02

| Population    | Count | %Gated |
|---------------|-------|--------|
| Single        | 10200 | 100    |
| CD90 & Single | 10180 | 99.8   |

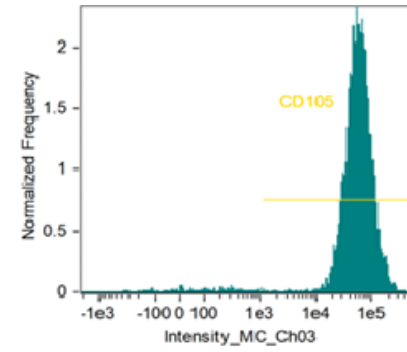

Intensity\_MC\_Ch03

| Population     | Count | %Gated |
|----------------|-------|--------|
| Single         | 10200 | 100    |
| CD105 & Single | 10007 | 98.1   |

B.

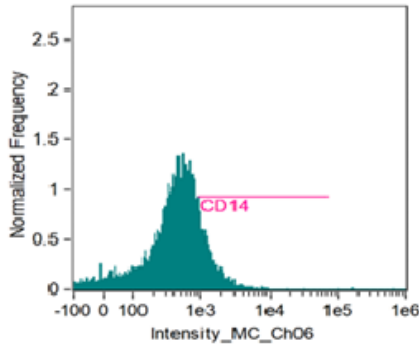

Intensity\_MC\_Ch06

| Population    | Count | %Gated |
|---------------|-------|--------|
| Single        | 9729  | 100    |
| CD14 & Single | 1712  | 17.6   |

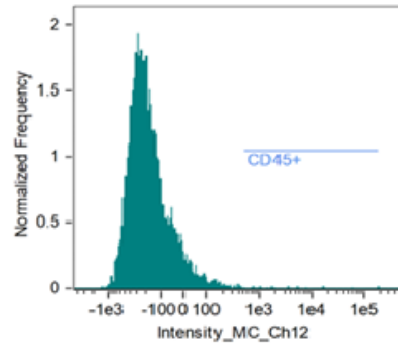

Intensity\_MC\_Ch12

| Population     | Count | %Gated |
|----------------|-------|--------|
| Single         | 9729  | 100    |
| CD45+ & Single | 12    | 0.12   |

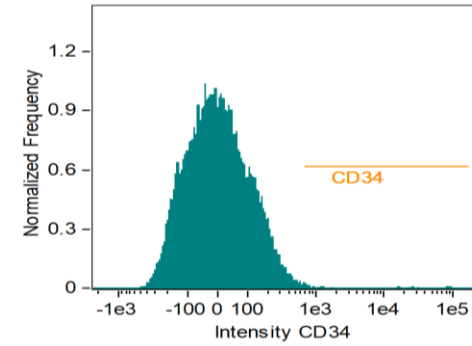

Intensity CD34

| Population    | Count | %Gated |
|---------------|-------|--------|
| Single        | 37798 | 100    |
| CD34 & Single | 111   | 0.29   |

Fig. S2. Flowcytometry characterizing the cell surface markers confirming that isolated cells were adipose tissue derived mesenchymal stem cells in Normoxia conditions.

- A. Cells strongly positive for markers CD73, CD90 and CD105
- B. Cells negative for markers CD14, CD34 and CD45

A.

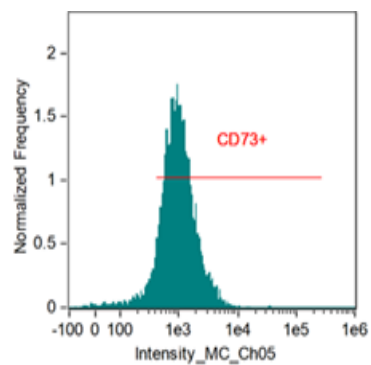

Intensity\_MC\_Ch05

| Population     | Count | %Gated |
|----------------|-------|--------|
| Single         | 9878  | 100    |
| CD73+ & Single | 8963  | 90.7   |

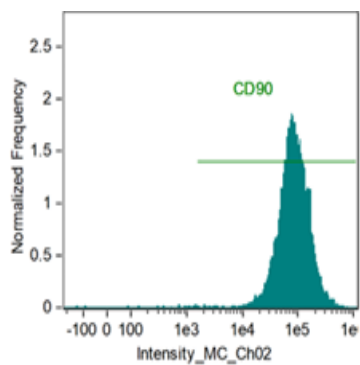

Intensity\_MC\_Ch02

| Population    | Count | %Gated |
|---------------|-------|--------|
| Single        | 9878  | 100    |
| CD90 & Single | 9859  | 99.8   |

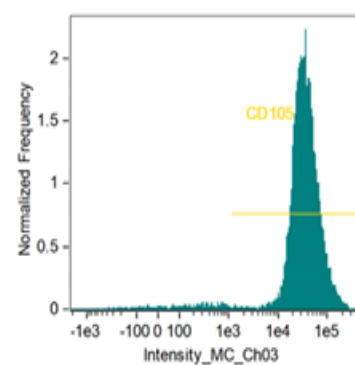

Intensity\_MC\_Ch03

| Population     | Count | %Gated |
|----------------|-------|--------|
| Single         | 9878  | 100    |
| CD105 & Single | 9610  | 97.3   |

B.

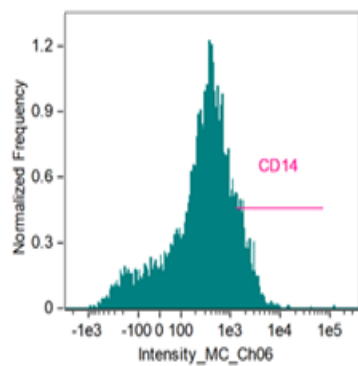

Intensity\_MC\_Ch06

| Population    | Count | %Gated |
|---------------|-------|--------|
| Single        | 9463  | 100    |
| CD14 & Single | 1126  | 11.9   |

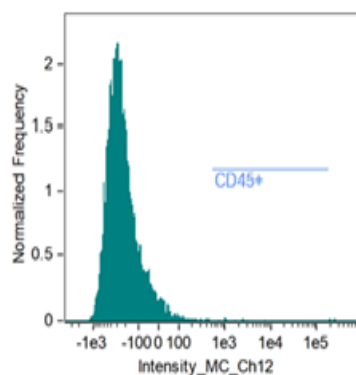

Intensity\_MC\_Ch12

| Population     | Count | %Gated |
|----------------|-------|--------|
| Single         | 9463  | 100    |
| CD45+ & Single | 8     | 0.08   |

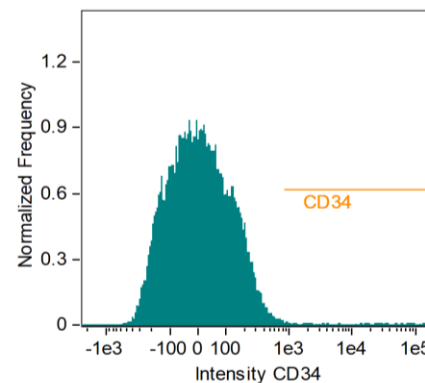

Intensity CD34

| Population    | Count | %Gated |
|---------------|-------|--------|
| Single        | 28559 | 100    |
| CD34 & Single | 60    | 0.21   |

Fig. S3. Flowcytometry characterizing the cell surface markers confirming that isolated cells were adipose tissue derived mesenchymal stem cells in Hypoxia conditions.

A. Cells strongly positive for markers CD73, CD90 and CD105

B. Cells negative for markers CD14, CD34 and CD45



A.

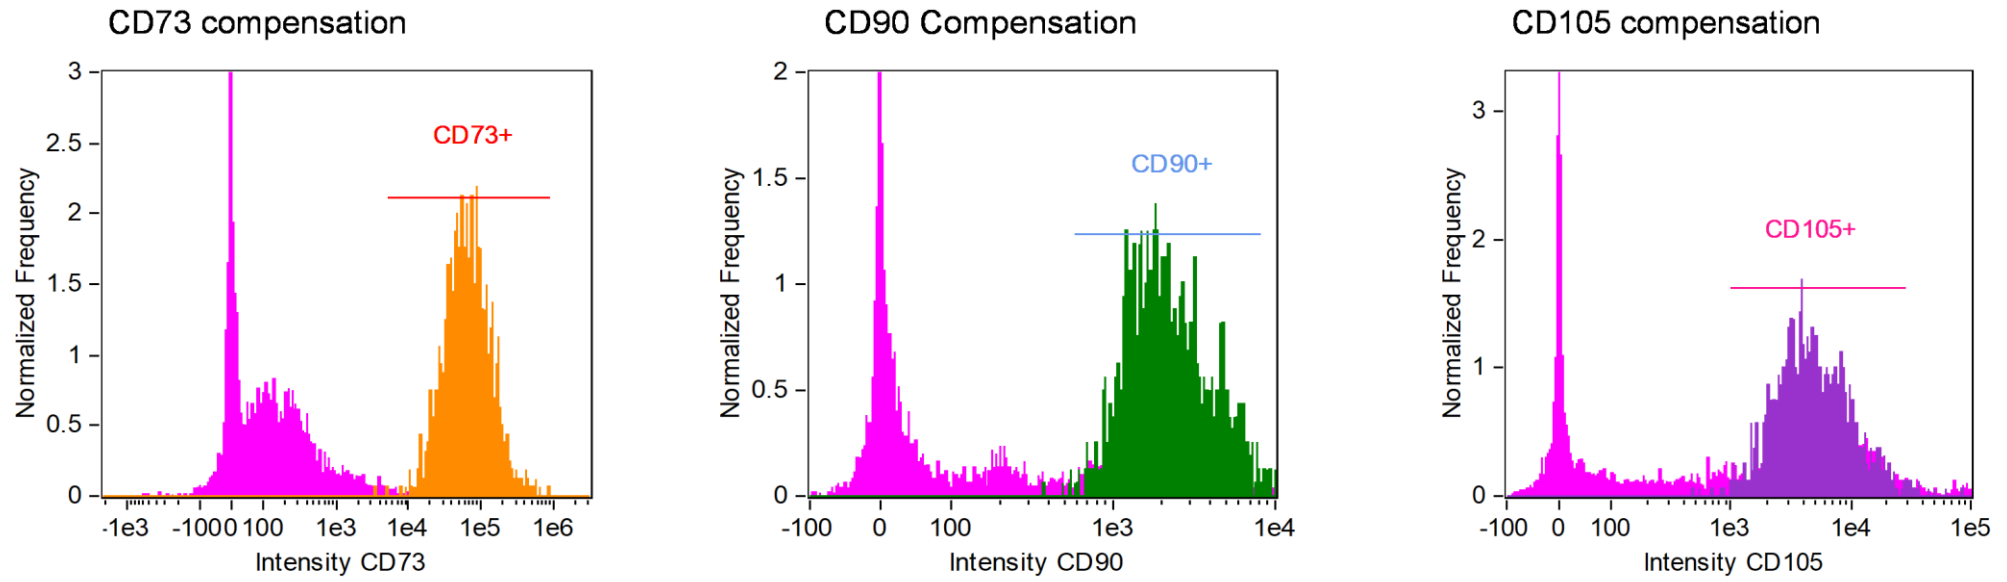

**Fig. S4. A.** Adipose tissue derived mesenchymal stem cells were stained with fluorescently conjugated antibodies against CD73, CD90, CD105 and the expression was analyzed by flow cytometry. The histogram in pink represents the isotype control and the histogram in orange, green, purple respectively represents the stained sample. Cells strongly positive for markers CD73, CD90 and CD105

### A. ADIPOCYTE LINEAGE

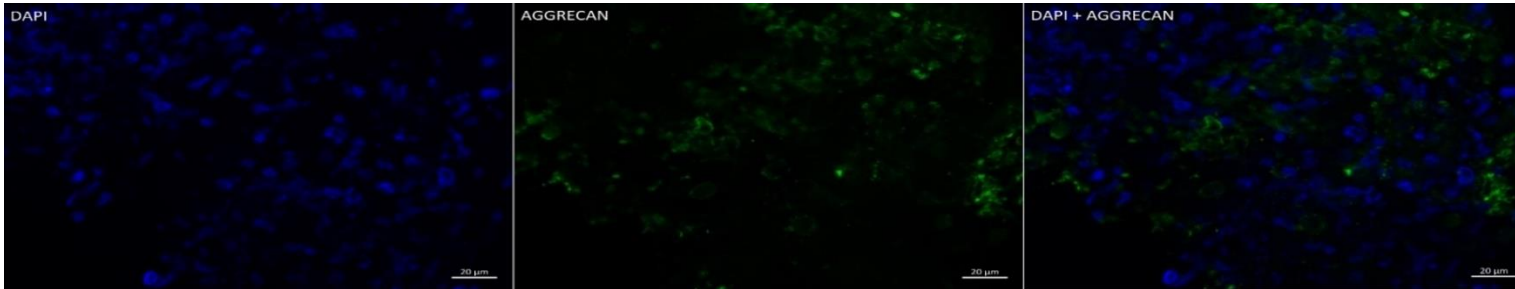

### B. OSTEOCYTE LINEAGE

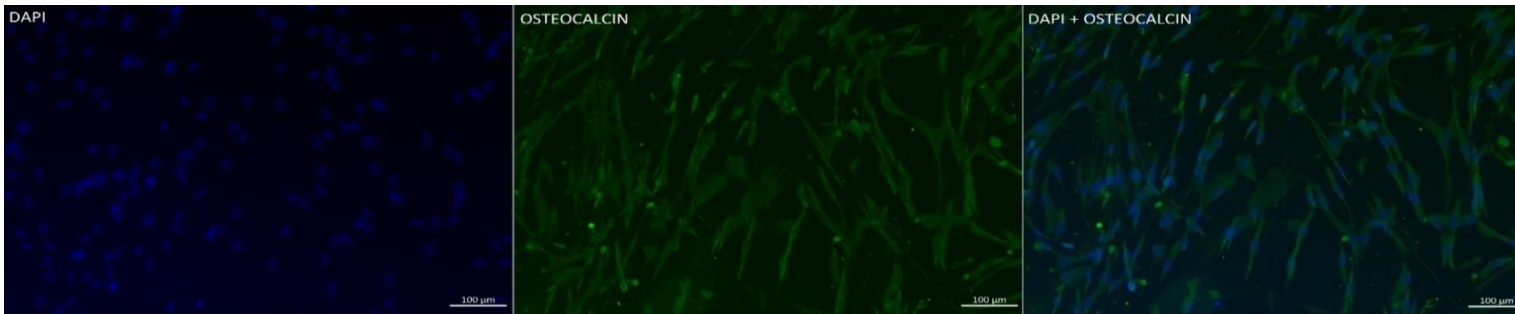

### C. CHONDROCYTES LINEAGE

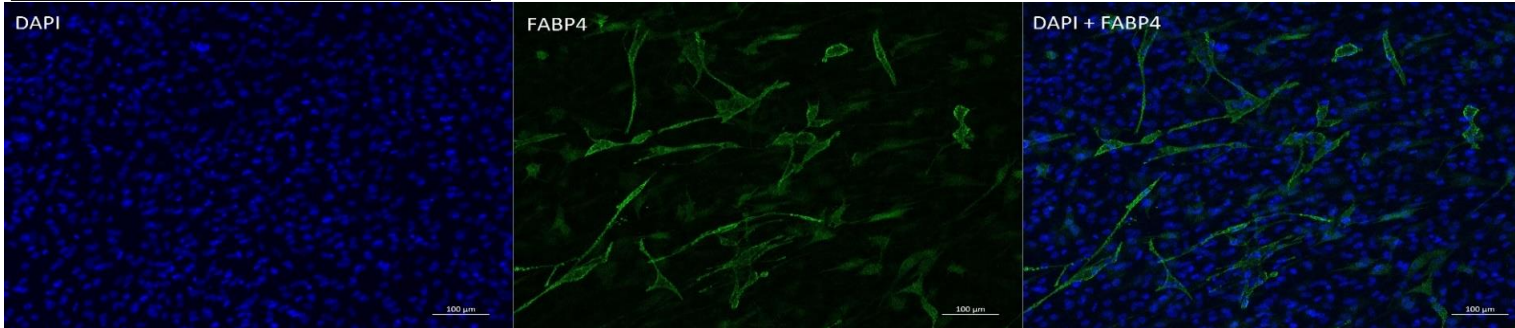

### D. MSC TRILINEAGE DIFFERENTIATION

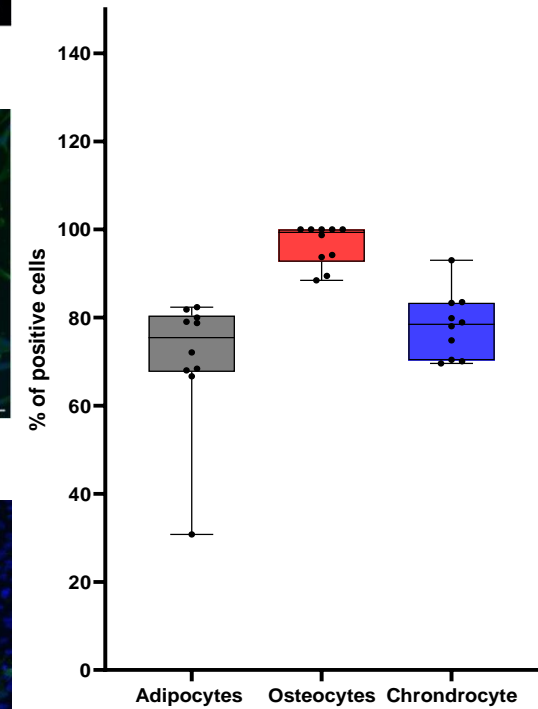

Fig. S5. Differentiation of cells grown after isolation from adipose tissue into adipocytes (A), osteocytes (B), chondrocytes (C), and quantification of adipocytes, osteocytes, and chondrocytes (D) quantification confirming their mesenchymal origin and regenerative properties. Images captured after fluorescent staining of differentiated cells.

Figure: S6

A.

Upregulated genes between HTN and HC (Normoxia)

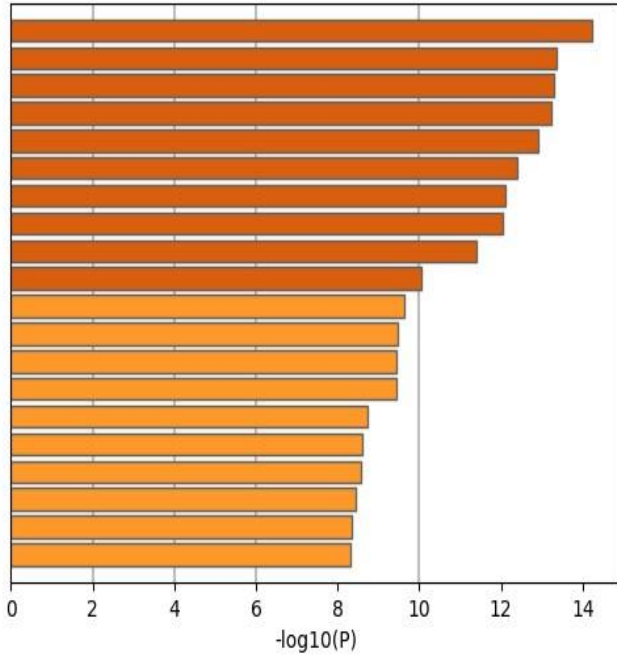

B.

Downregulated genes between HTN and HC (Normoxia)

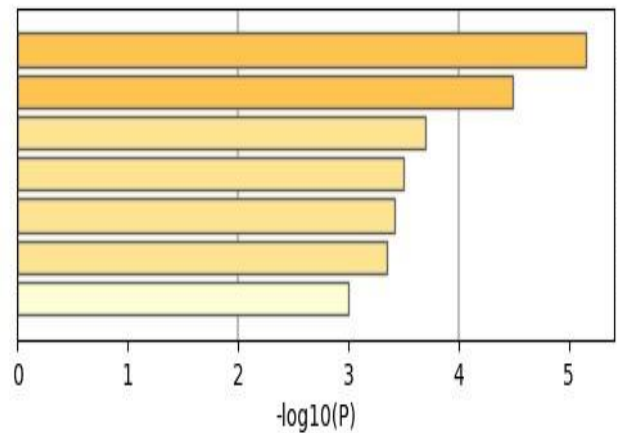

C.

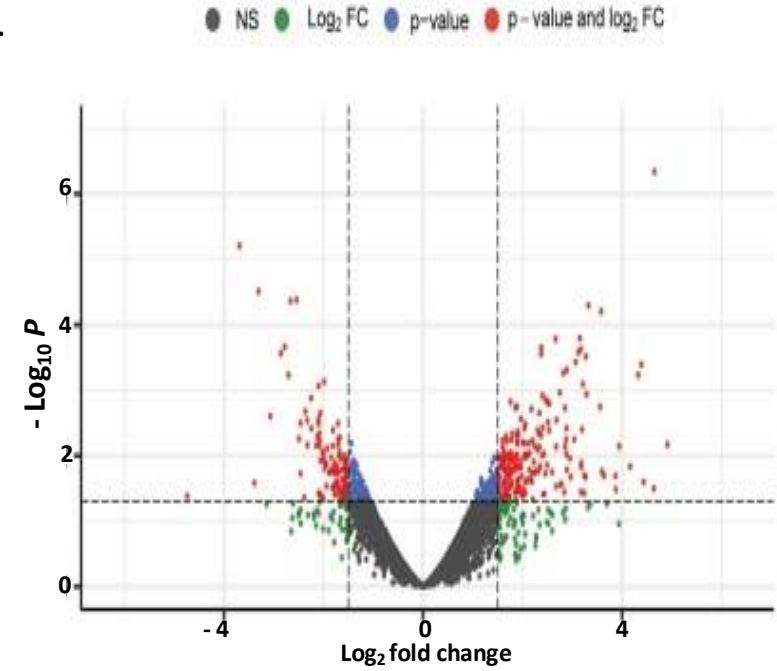

D.

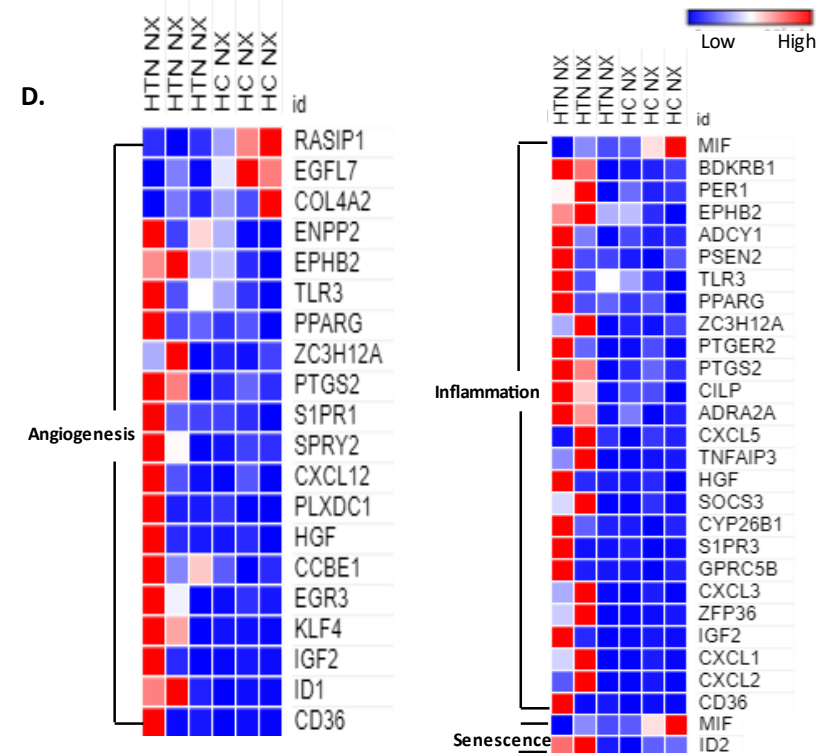

Figure: S7

A.

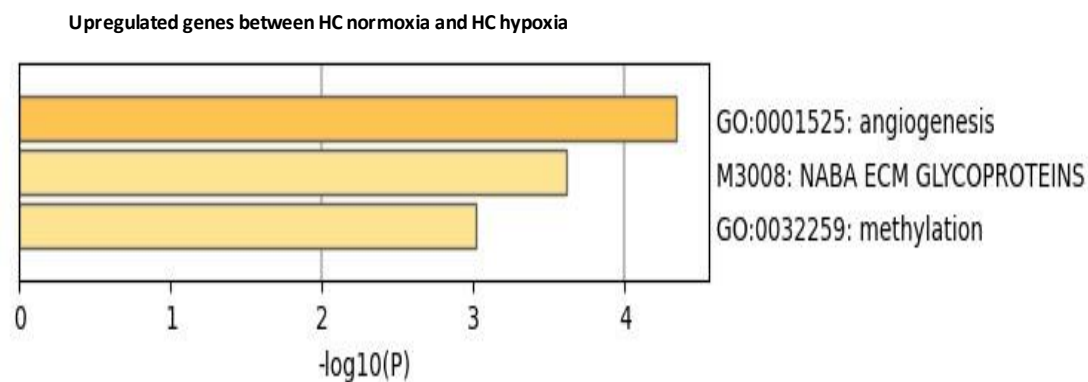

B.

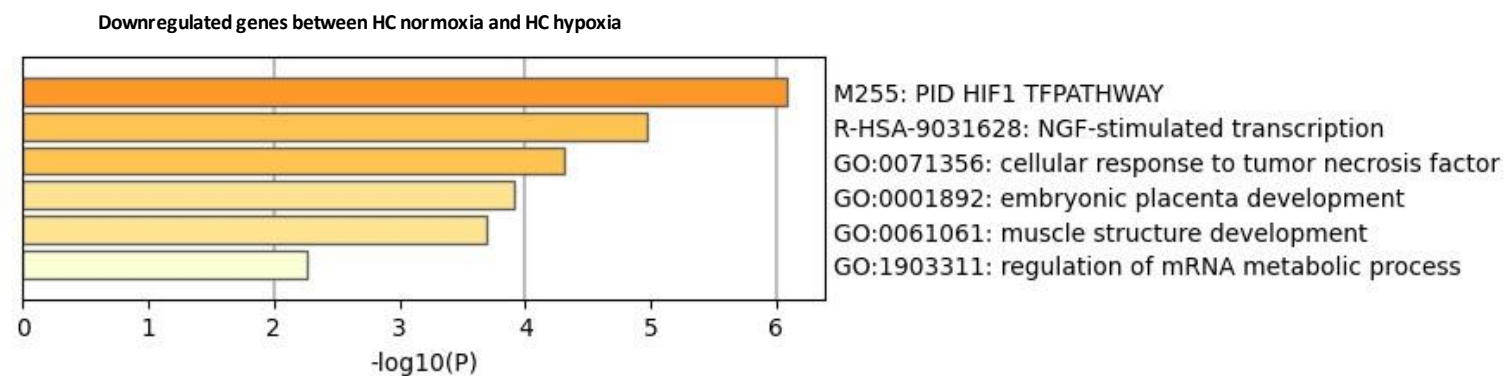

C.

● NS ● Log<sub>2</sub> FC ● p-value ● p-value and log<sub>2</sub> FC

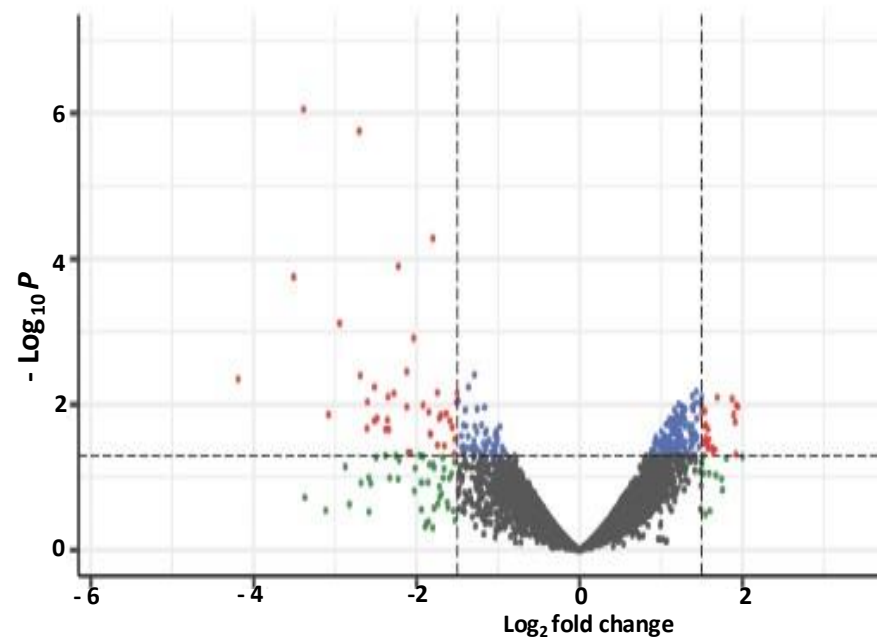

D.

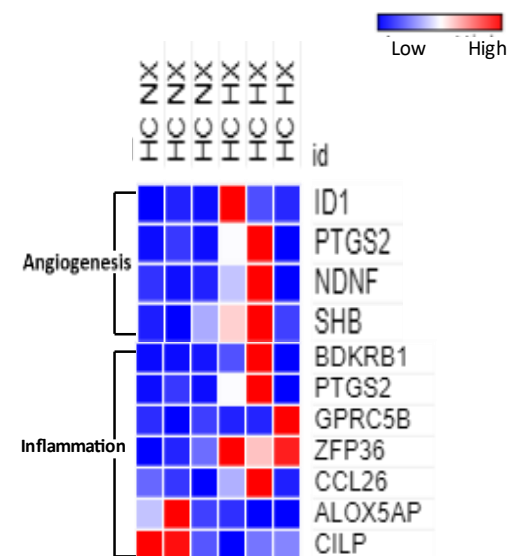

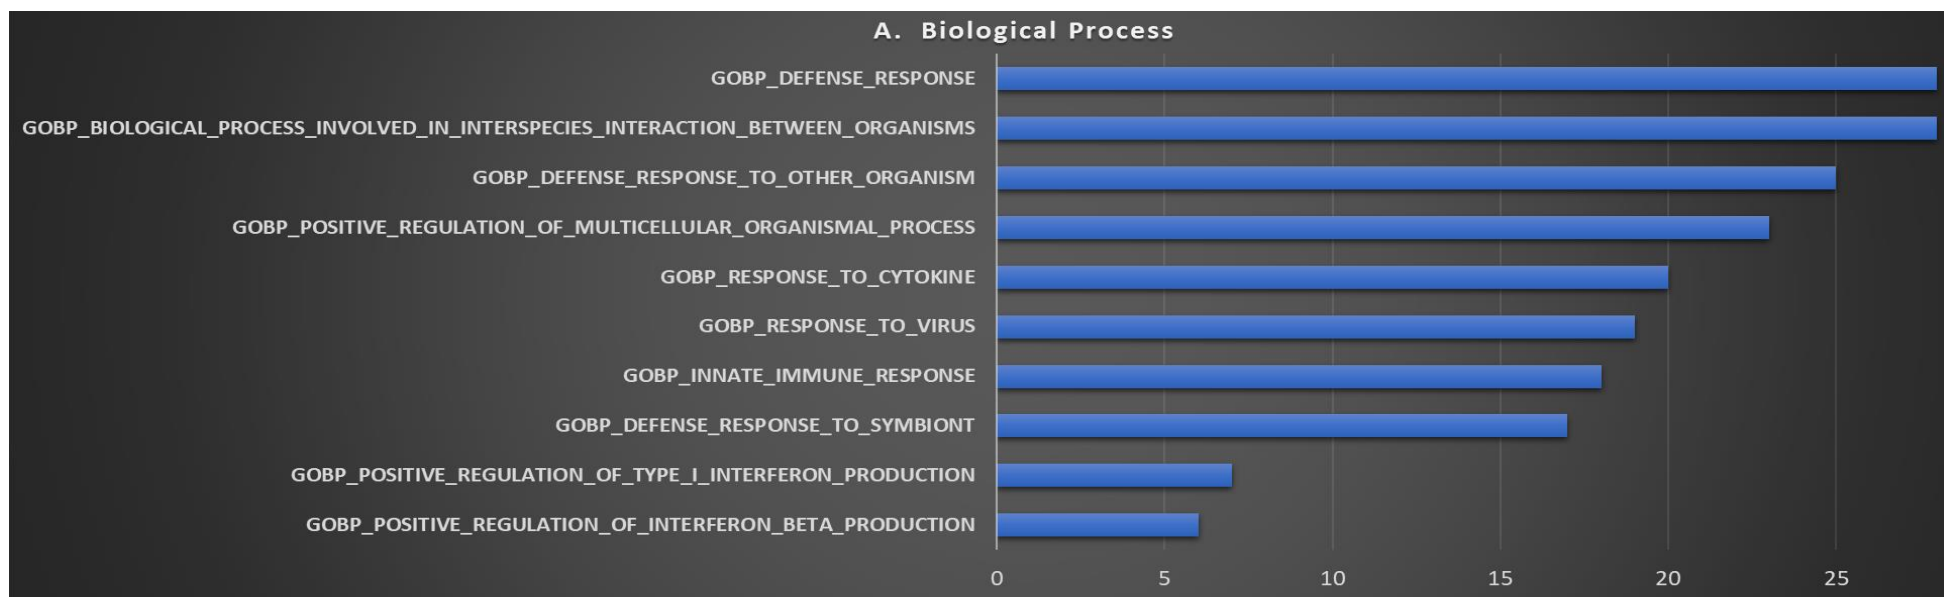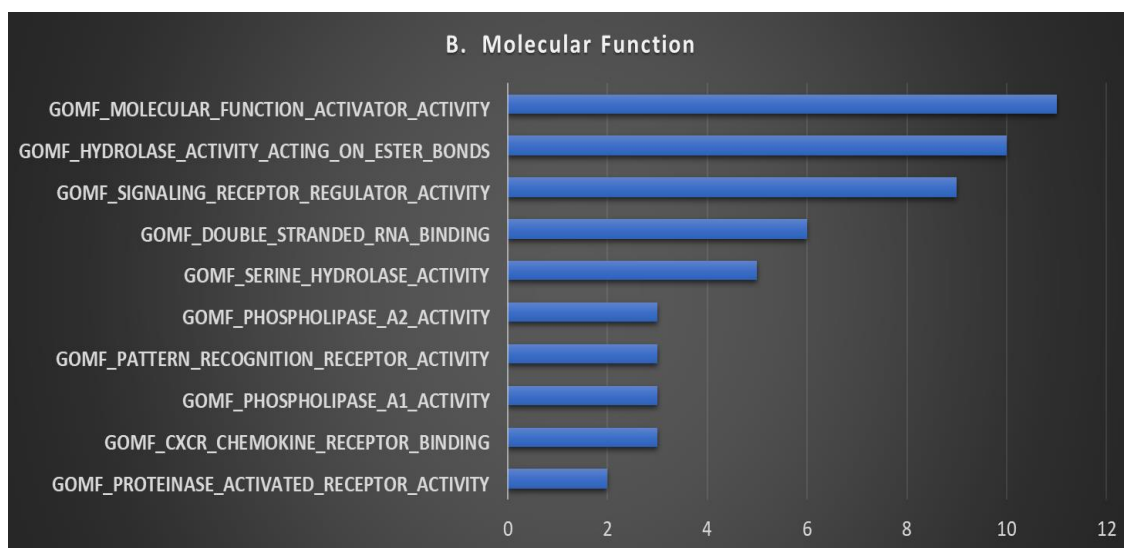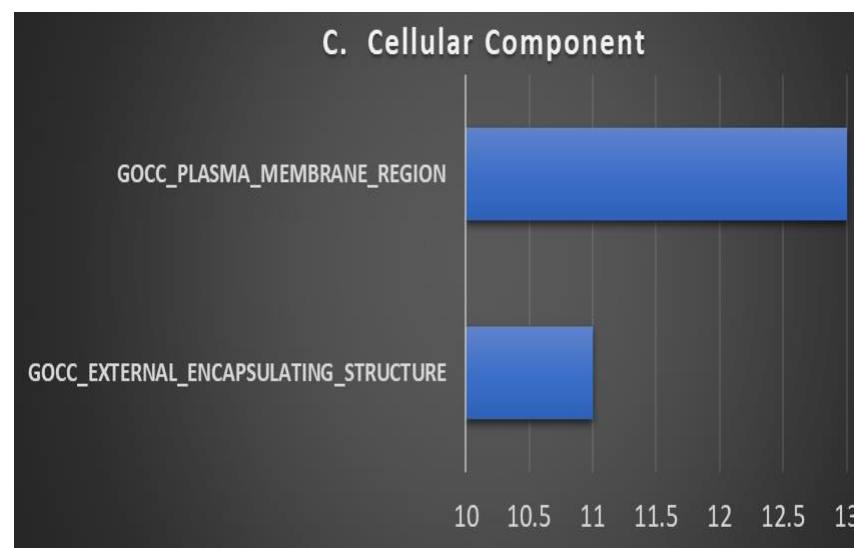

**Fig.S8. Hypoxia HKD vs Normoxia HKD MSCs. Gene ontology (GO) analysis pathways (A) Biological Process (B) Molecular Functions (C) Cellular Components of Upregulated gene sets with significant changes between Hypoxia HKD and Normoxia HKD MSCs.**



**Figure: S9**  
**Gene and transcription factors network interactions between HKD and HC (Normoxia)**

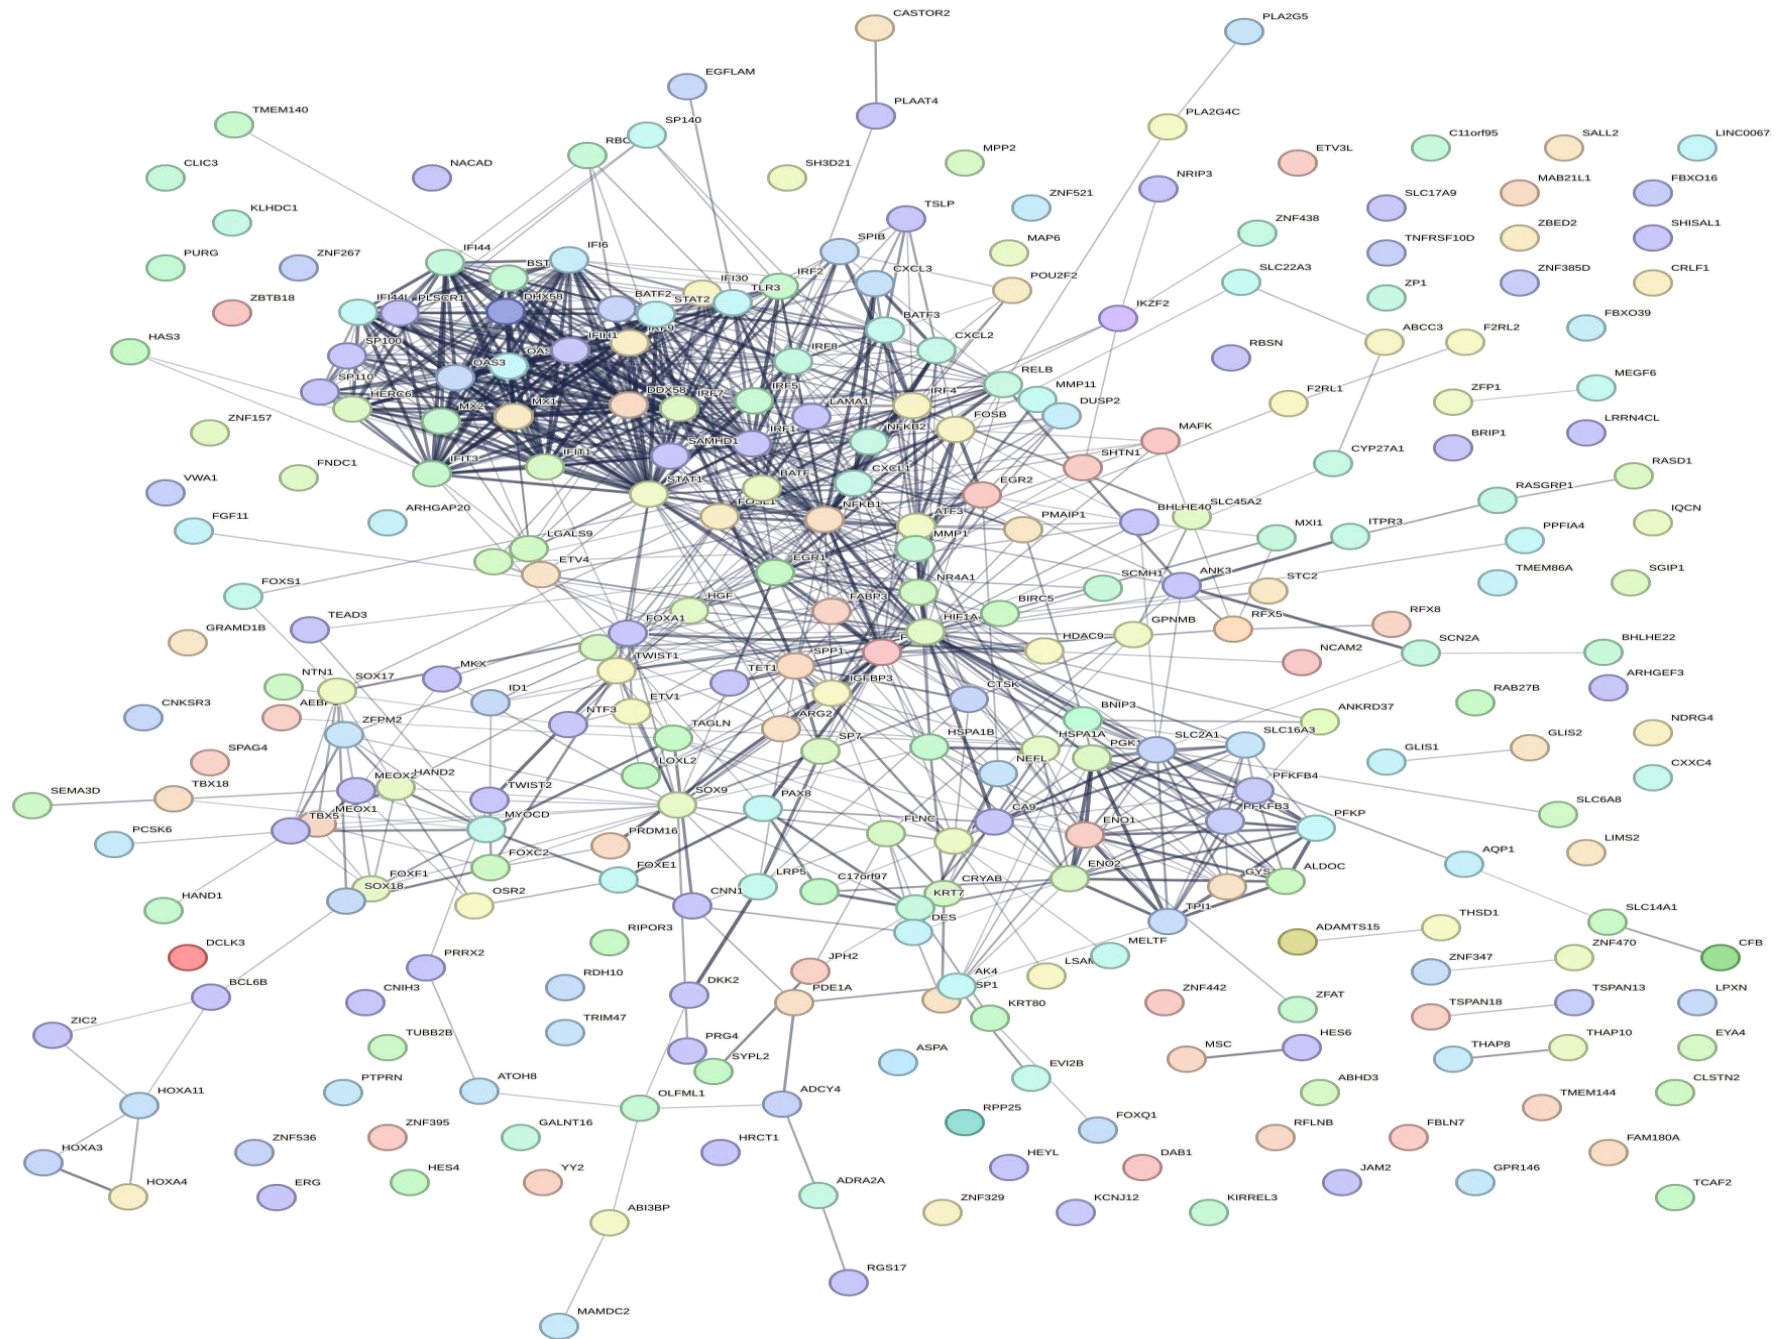

**Figure: S10**  
**Gene and transcription factors network interactions between HKD and HTN (Normoxia)**

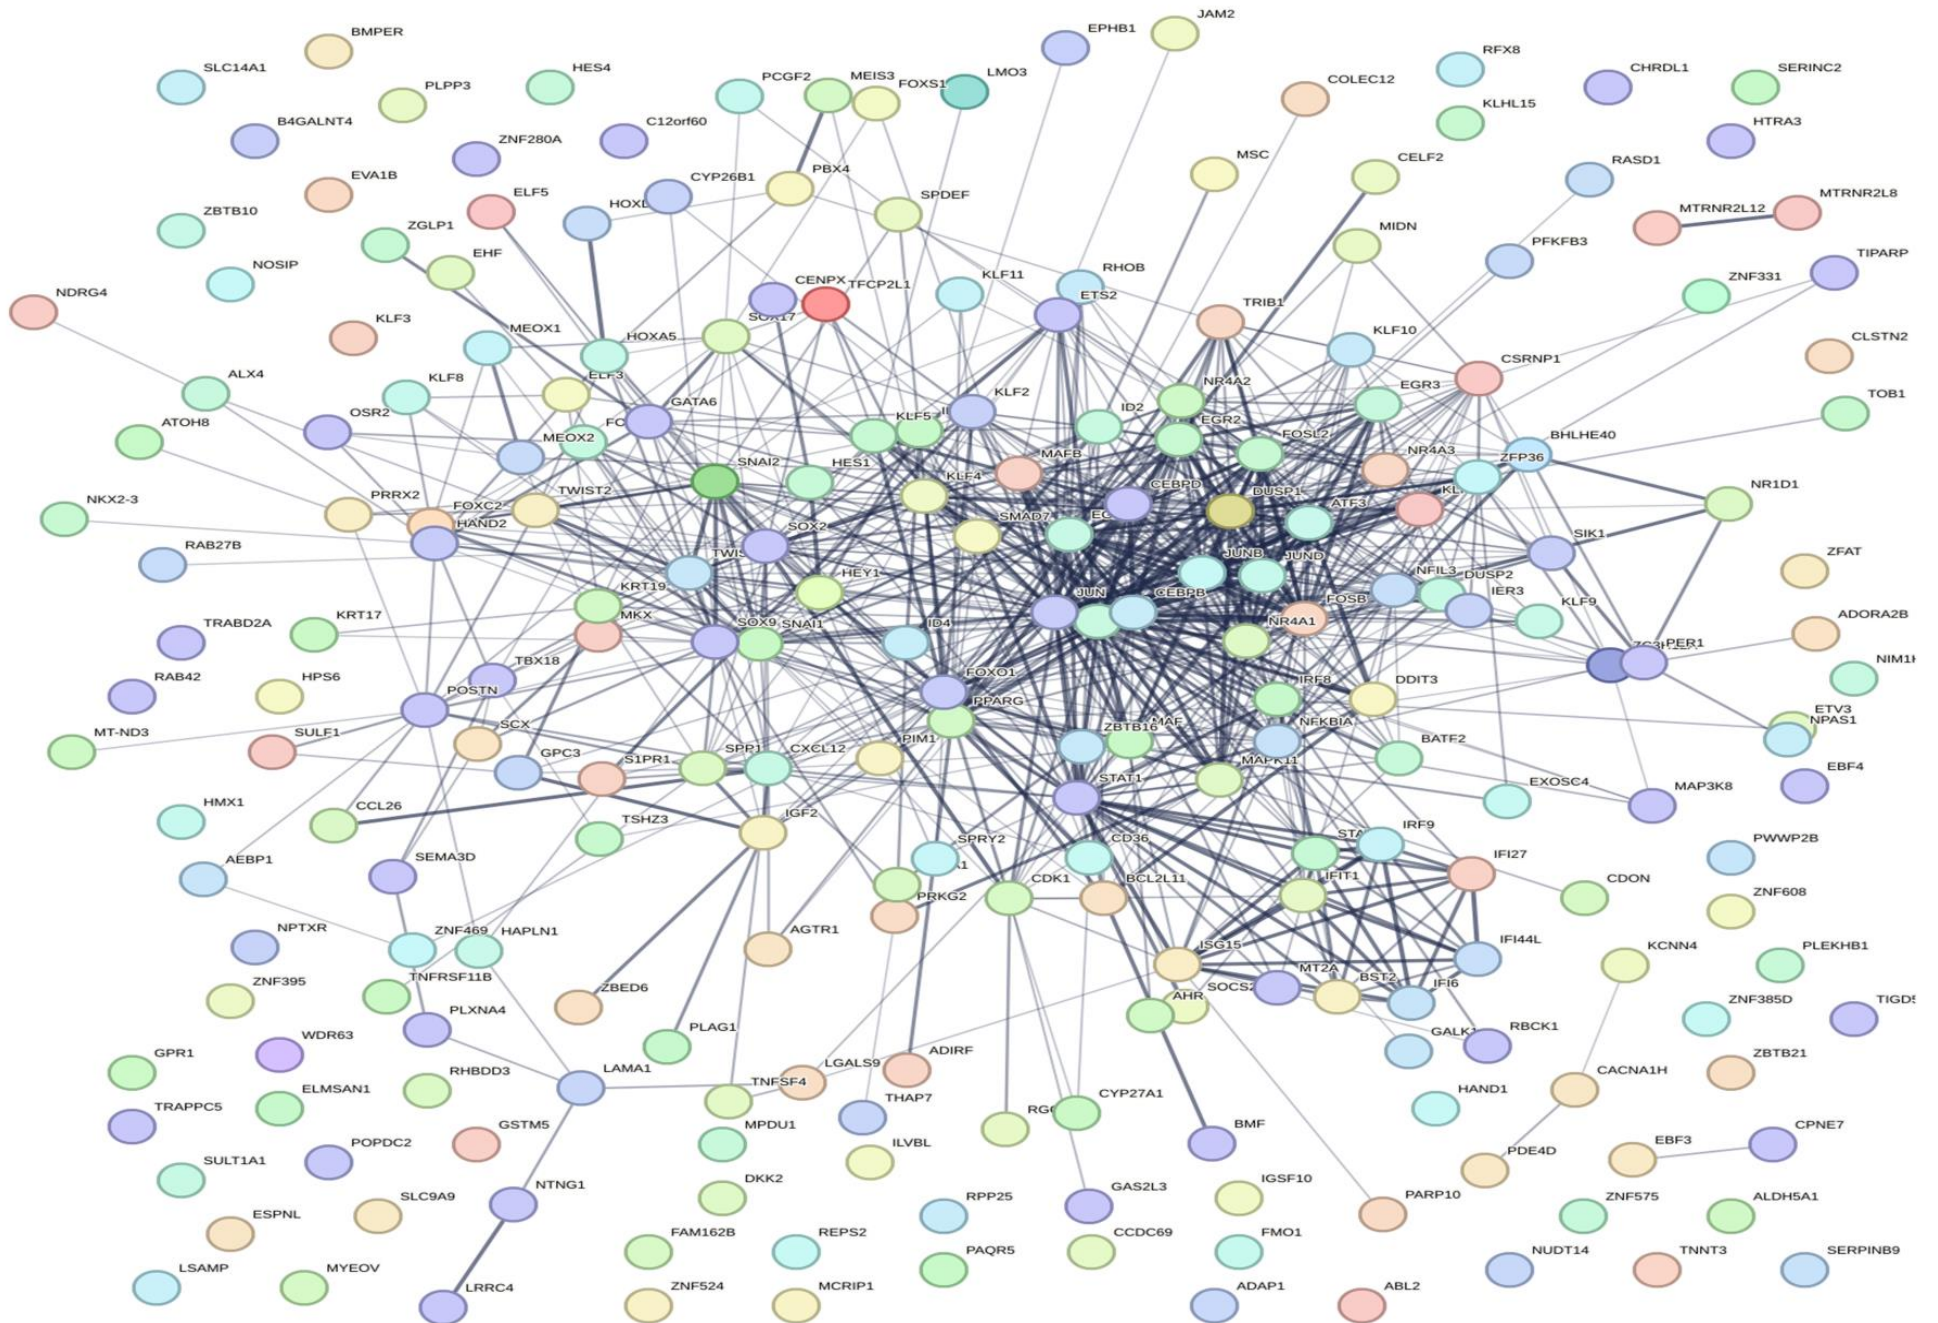







Figure S12

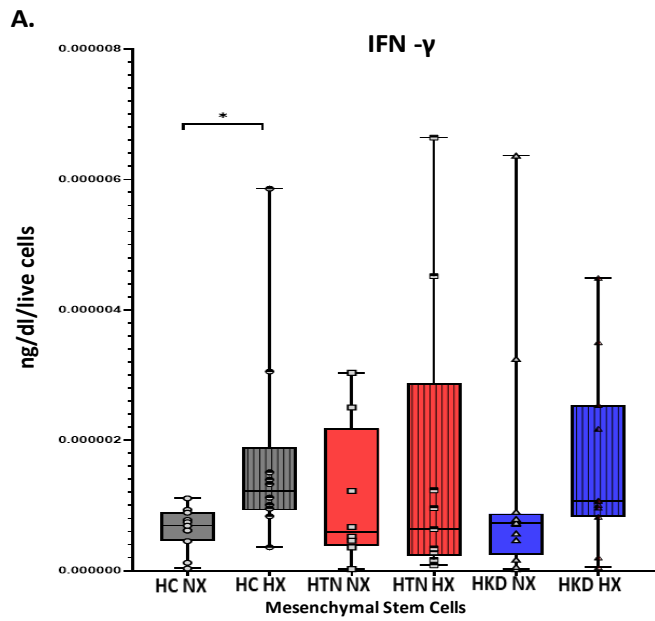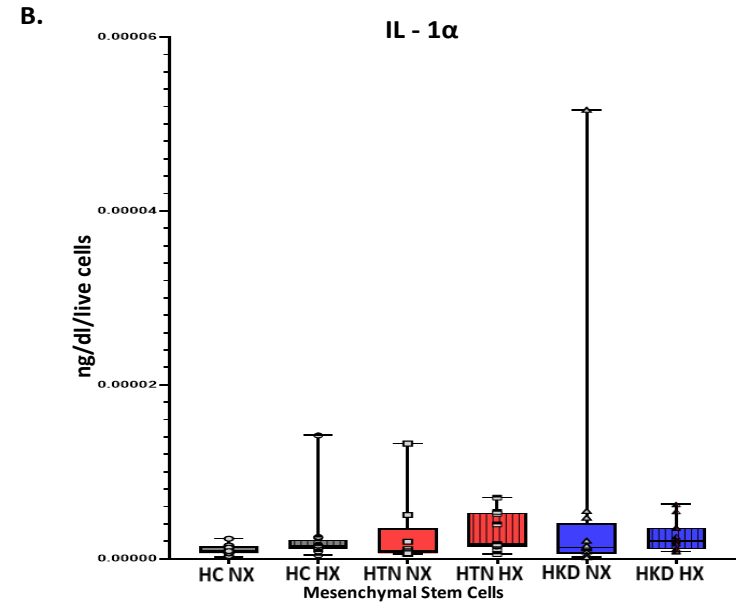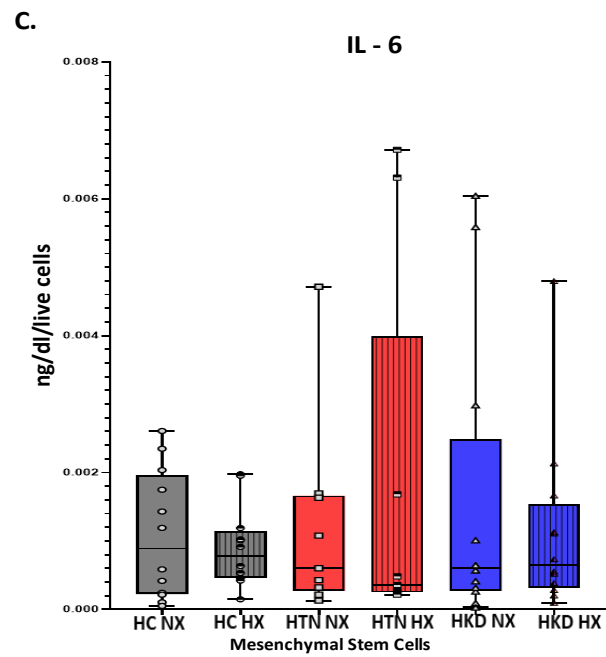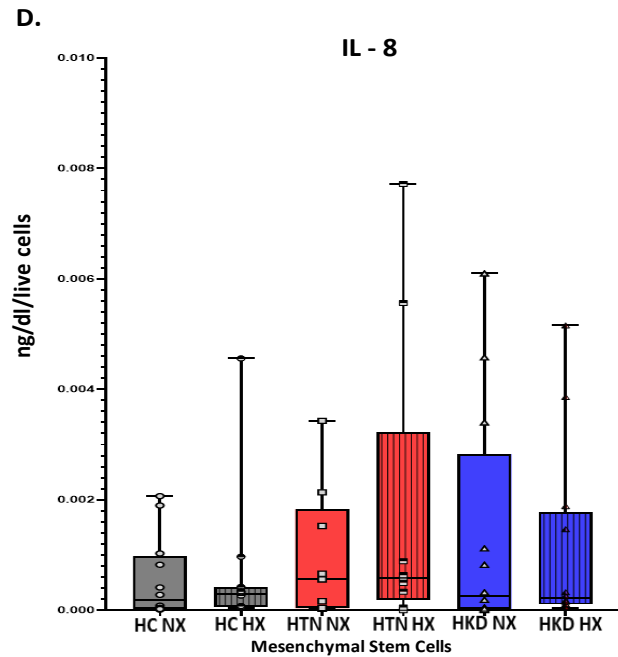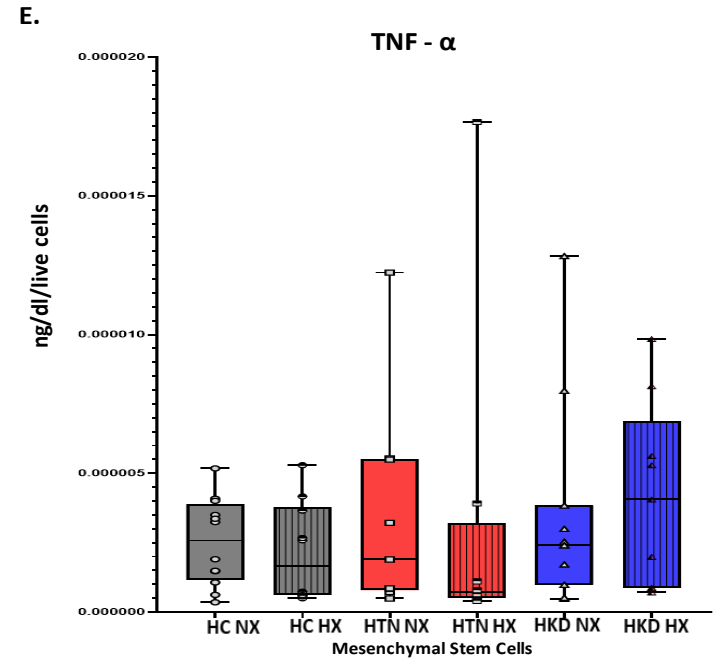

**Table S1- Angiogenesis secretome markers at baseline normoxia**

| VARIABLES            | HC (12)                                                                      | HTN (9)                                                                      | HKD (12)                                                                    | P value |
|----------------------|------------------------------------------------------------------------------|------------------------------------------------------------------------------|-----------------------------------------------------------------------------|---------|
| EGF                  | 7.94108e <sup>-9</sup> (5.97554e <sup>-9</sup> -<br>1.00493e <sup>-8</sup> ) | 4.98339e <sup>-9</sup> (3.44828e <sup>-9</sup> -<br>1.5619e <sup>-8</sup> )  | 7.19277e <sup>-9</sup> (5.9043e <sup>-9</sup> -<br>1.10211e <sup>-8</sup> ) | NS      |
| HGF                  | 7.0609e <sup>-8</sup> (3.90828e <sup>-8</sup> -<br>2.02851e <sup>-7</sup> )  | 7.03846e <sup>-8</sup> (3.43478e <sup>-8</sup> -<br>2.77636e <sup>-7</sup> ) | 3.7796e <sup>-8</sup> (2.8515e <sup>-8</sup> -2.111e <sup>-7</sup> )#       | NS      |
| VEGF                 | 0.00018 (5.88315e <sup>-5</sup> -<br>0.000262995)                            | 0.000338342 (8.01248e <sup>-5</sup> -<br>0.001057009)                        | 0.000119132 (4.22891e <sup>-5</sup> -<br>0.000373018)                       | NS      |
| VEGF (at gene level) | 0.977101 (0.55706725-<br>1.3536075)                                          | 1.07 (0.64-1.435)                                                            | 1.21 (0.79-1.46)                                                            | NS      |
| EGF (at gene level)  | 0.97 (0.705- 2.1325)                                                         | 3.06 (0.24- 5.68)                                                            | 1.344779401 (0.425334961 -<br>3.110220509)                                  | NS      |

Abbreviations: HC: healthy control; HTN: hypertension; HKD: Hypertensive kidney disease

**Table S2- Senescence markers at baseline normoxia**

| VARIABLES | HC (12)                           | HTN (9)                           | HKD (12)                         | P value |
|-----------|-----------------------------------|-----------------------------------|----------------------------------|---------|
| P16       | 1.063 (0.430- 1.696)              | 1.160 (0.570- 1.480)              | 0.866 (0.472- 2.445)             | NS      |
| P21       | 0.810 (0.623- 1.190)              | 0.870 (0.610- 1.490)              | 0.895 (0.640- 1.113)             | NS      |
| SA β GAL  | 15765.5 (10393.500-<br>29550.500) | 35322.5 (25168.500-<br>52886.000) | 14956.5 (6672.875-<br>19085.000) | *0.04   |

Abbreviations: HC: healthy control; HTN: hypertension; HKD: Hypertensive kidney disease

**Table S3 – PCR Markers at baseline normoxia**

| <b>VARIABLES</b> | <b>HC (12)</b>          | <b>HTN (9)</b>          | <b>HKD (12)</b>         | <b>P value</b> |
|------------------|-------------------------|-------------------------|-------------------------|----------------|
| TGF - $\beta$    | 24.214 (23.488-25.148)  | 24.800 (24.441, 25.324) | 25.182 (24.504, 25.484) | NS             |
| PGE              | 26.827 (26.414- 27.859) | 27.621 (26.550- 28.666) | 27.020 (26.817- 27.341) | NS             |
| iNOS             | 36.454 (35.355- 37.295) | 38.396 (37.897- 39.677) | 36.625 (36.351- 37.391) | NS             |
| IDO              | 36.603 (34.912- 39.251) | 38.831 (36.902- 39.447) | 37.380 (35.873- 38.867) | NS             |
| IL 10            | 38.702 (35.725- 39.716) | 35.699 (34.445- 39.221) | 36.374 (34.541- 38.427) | NS             |
| IL 4             | 39.178 (37.917- 40.000) | 39.067 (37.522- 40.000) | 38.511 (36.663- 40.000) | NS             |
| GAPDH            | 20.156 (19.052- 21.981) | 21.375 (20.167- 22.746) | 20.847 (20.310- 21.231) | NS             |

Abbreviations: HC: healthy control; HTN: hypertension; HKD: Hypertensive kidney disease; NS: non-significant

**Table S4- Correlation between age and MSC function in hypoxic and normoxic conditions**

| MSC function     | Age  |      |
|------------------|------|------|
|                  | r    | P    |
| NX Proliferation | 0.16 | 0.36 |
| HX Proliferation | 0.17 | 0.33 |

Abbreviations: MSC: mesenchymal stem cell; NX: normoxia; HX: hypoxic

**REFERENCE**

[1] Isik B, Thaler R, Goksu BB, Conley SM, Al-Khafaji H, Mohan A, Afarideh M, Abumoawad AM, Zhu XY, Krier JD, Saadiq IM, Tang H, Eirin A, Hickson LJ, van Wijnen AJ, Textor SC, Lerman LO, Herrmann SM: Hypoxic preconditioning induces epigenetic changes and modifies swine mesenchymal stem cell angiogenesis and senescence in experimental atherosclerotic renal artery stenosis. *Stem Cell Res Ther* 2021, 12:240.
